# Supplementary material
Source: publisher figshare collection journal article supplement (https://sage.figshare.com/ndownloader/files/22078023)

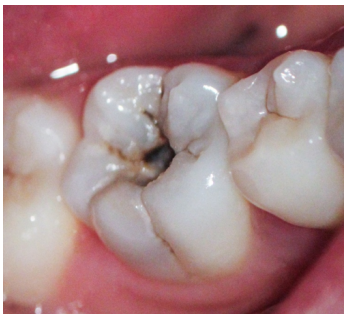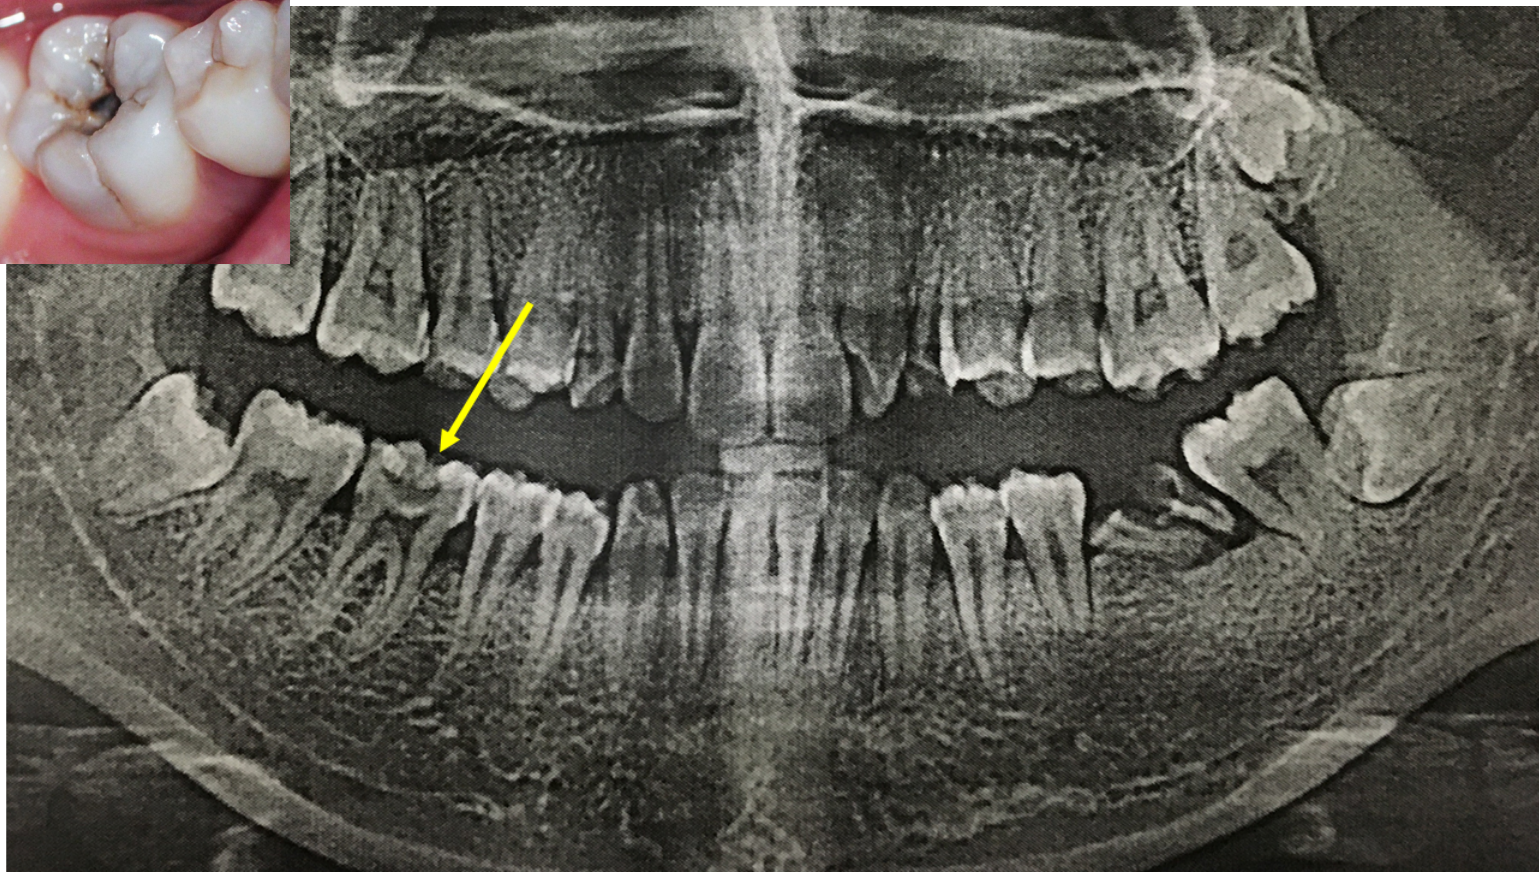

Appendix Figure 1. Deep carious lesion diagnosis.

Supplement: Supplementary file 1 [file 22078023]
